# Supplementary material for: Photoluminescence Induced in Mineral Oil by Ionizing Radiation
Source: MDPI journal article supplement (doi:10.3390/lubricants11070287), 2023-07-07
Supplement: s1 [file s1]

## Supplementary Materials

# Photoluminescence Induced in Mineral Oil by Ionizing Radiation

Valery N. Bliznyuk <sup>1,\*†</sup>, Jonas Smith <sup>1</sup>, Tyler Guin <sup>2</sup>, Chris Verst <sup>3</sup>, James Folkert <sup>2</sup>, Kori McDonald <sup>2</sup>, George Larsen <sup>2</sup> and Timothy A. DeVol <sup>1,\*†</sup>

<sup>1</sup> Department of Environmental Engineering and Earth Sciences, Clemson University, Clemson, SC 29634, USA

<sup>2</sup> Hydrogen Isotope Processing Science, Savannah River National Laboratory, Aiken, SC 29803, USA

<sup>3</sup> Separation Sciences and Engineering, Savannah River National Laboratory, Aiken, SC 29803, USA

\* Correspondence: vblizny@clemson.edu (V.N.B.); devol@clemson.edu (T.A.D.)

† Current address: Center for Nuclear Environmental Engineering Sciences and Radioactive Waste Management Center (NEESRWM), Clemson University, Clemson, SC 29634, USA.

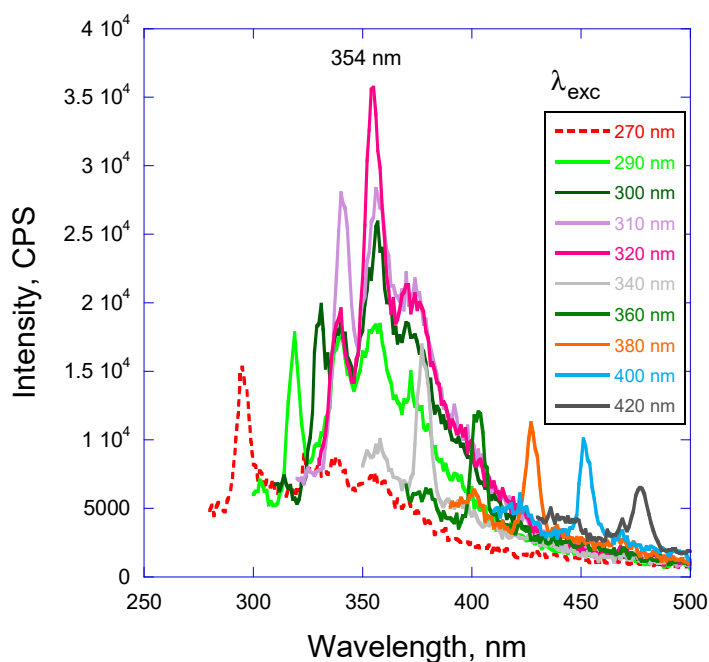

**Figure S1.** Fluorescence spectra of hexane at different excitation wavelengths.

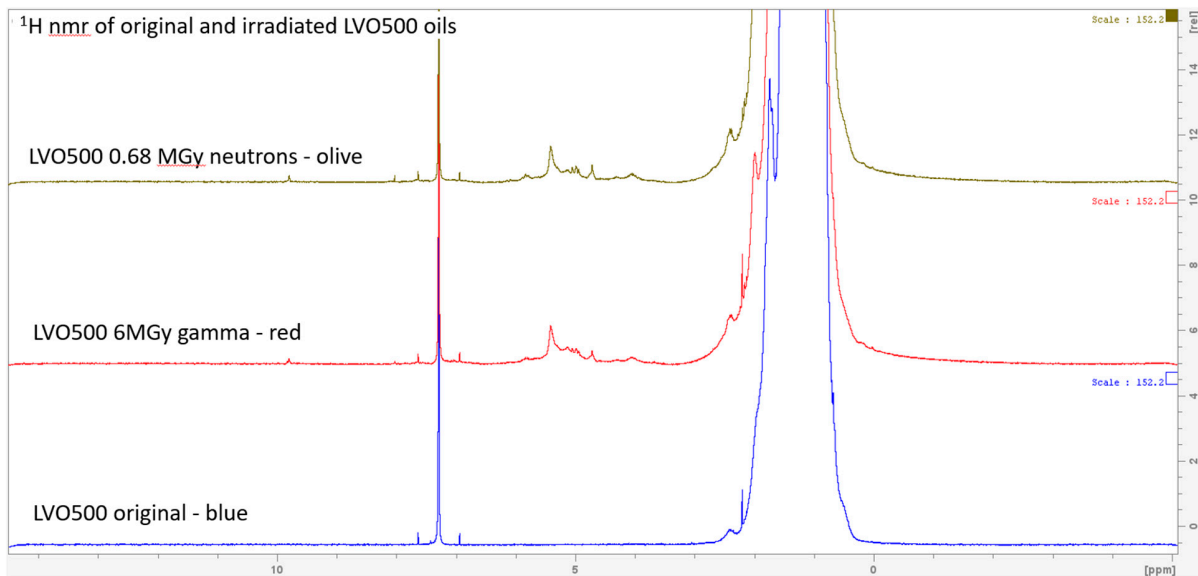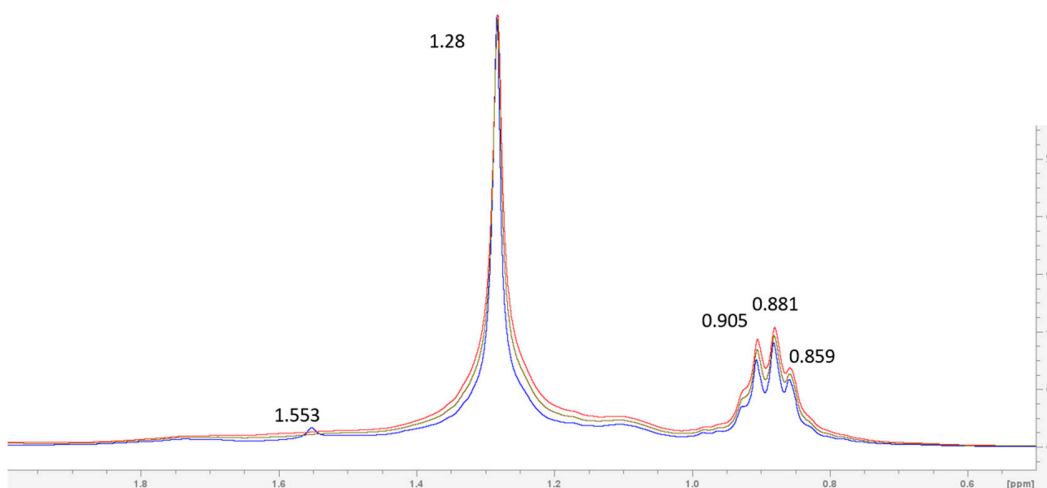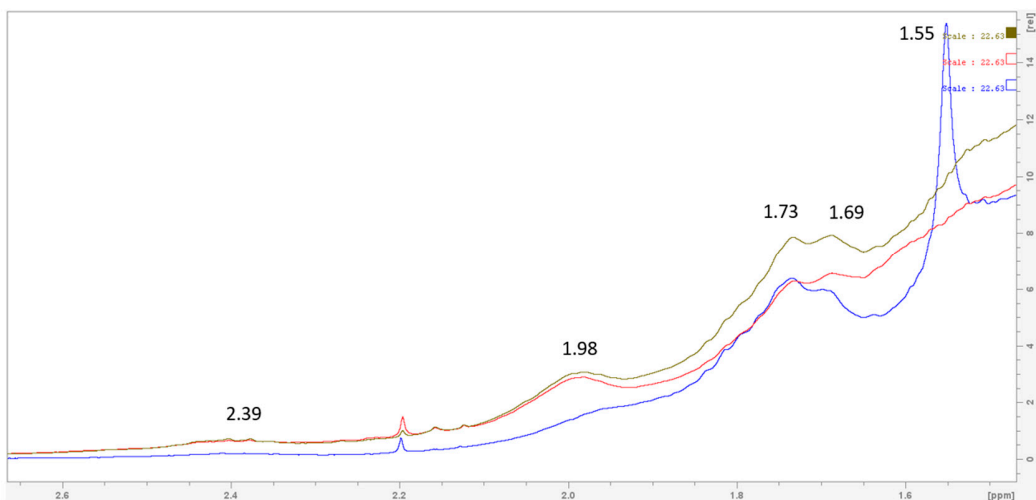

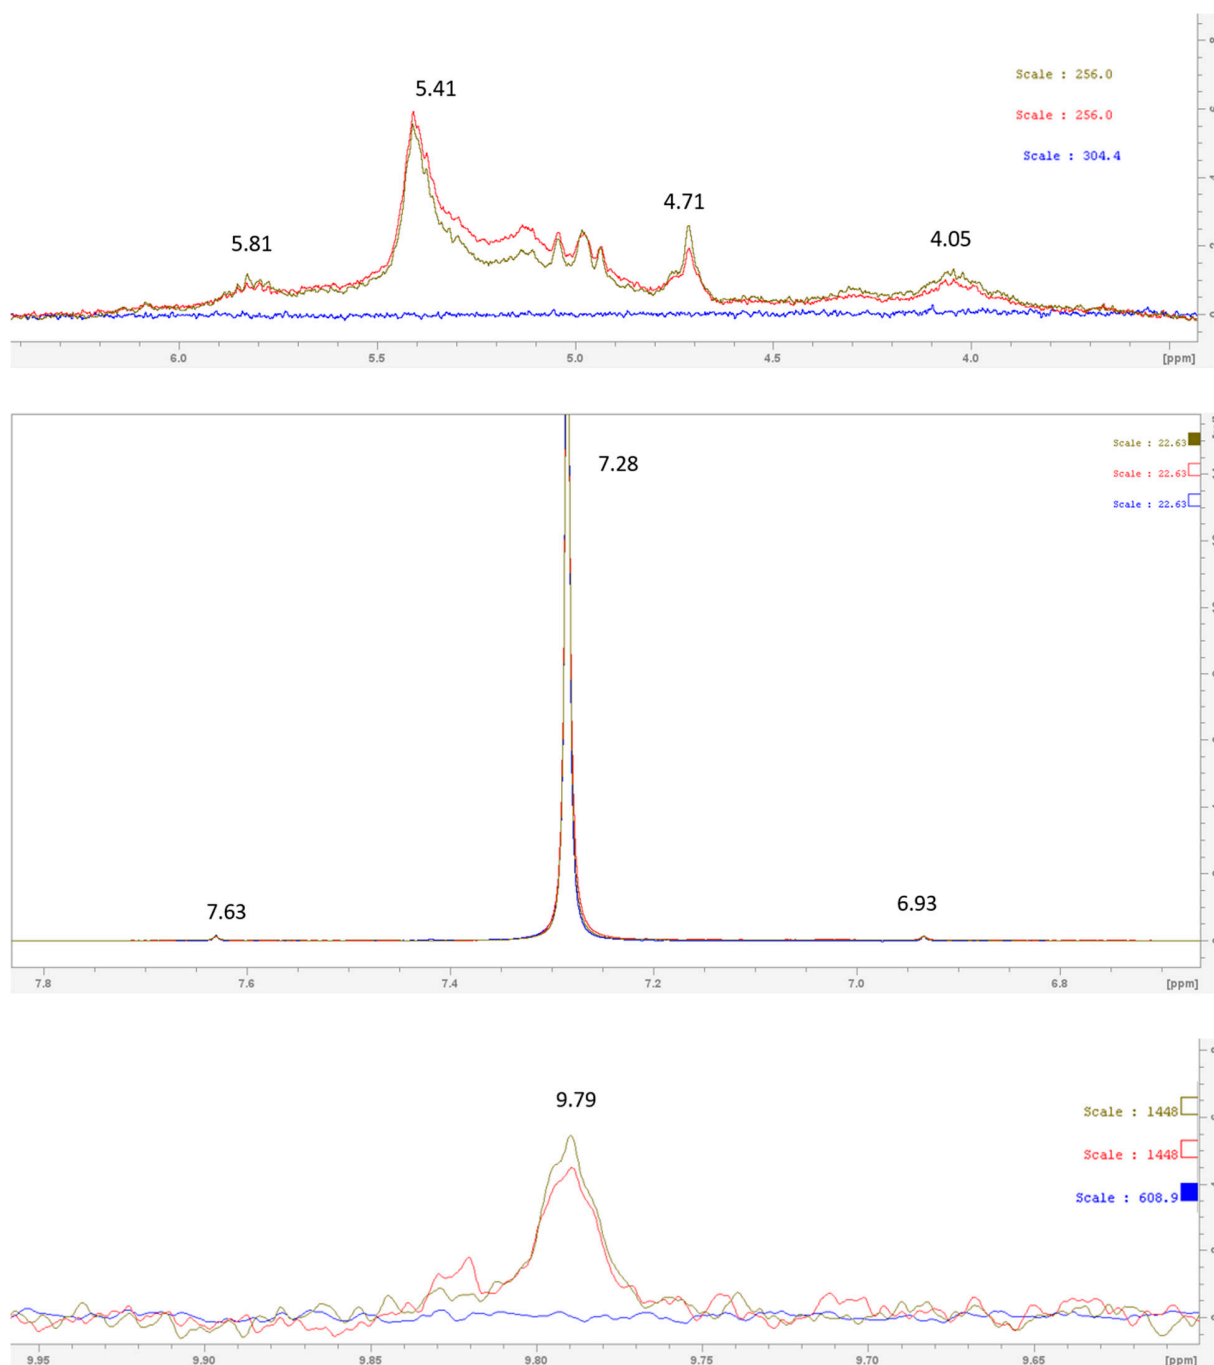

**Figure S2.** Proton NMR spectra of original LVO 500 oil (blue lines) and that exposed to 6 MGy gamma radiation (red lines) or a 0.68 MGy neutron (olive lines) dose.

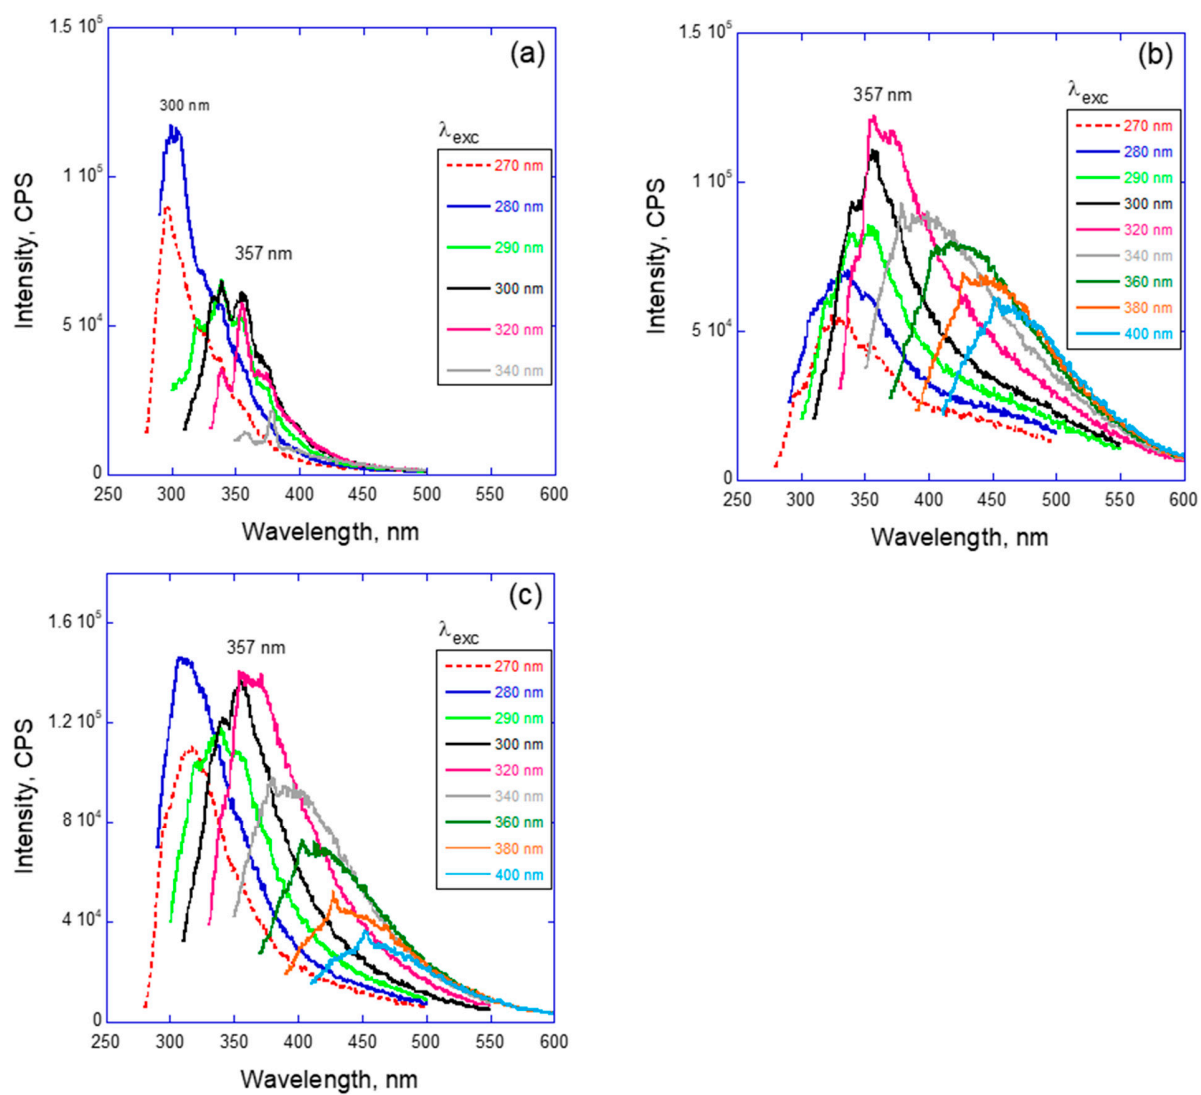

**Figure S3.** Fluorescence spectra of the original LVO500 oil (a) and that after thermal degradation at 200°C for one week in Ar atmosphere (b) or in the presence of oxygen (c) depending on the excitation wavelength.
